# Supplementary material for: Associations of IL-18 with Altered Cardiovascular Risk Profile in Psoriatic Arthritis and Ankylosing Spondylitis
Source: MDPI journal article supplement (doi:10.3390/jcm11030766), 2022-01-30
Supplement: s1 [file s1]

Supplementary Table S1. Extraarticular symptoms and frequency of HLA-B17 in AS and PsA patients.

| <b>Measured parameters</b> | <b>AS <i>n</i>=94</b> | <b>PsA total <i>n</i>=61</b> |
|----------------------------|-----------------------|------------------------------|
| Dactylitis                 | 3 (3.2%)              | 7 (11.5%)                    |
| Uveitis                    | 34 (35%)              | 2 (3.3%)                     |
| Enthesitis                 | 30 (30.9%)            | 8 (13.1)                     |
| HLA-B27                    | 83 (88.3 %)           | 20 (32.8%)                   |
